# Supplementary material for: Pharmacologic Prophylaxis of Portal Venous System Thrombosis after Splenectomy: A Meta-Analysis
Source: PubMed Central journal article supplement (PMC4163290; doi:10.1155/2014/292689), 2014-08-27

**Supplementary Table 1. Eligibility criteria of patients.**

| First author. Journal.<br>(Year)                      | Eligibility criteria of patients                                                                                                                                                                                                                                                                                                                                                                                                                                                                                                                                                                                                                                                                                                                                                                                                                                                                                                                                                                                                                                                                                                                                                                                                                                                                                                                                                                                                     |
|-------------------------------------------------------|--------------------------------------------------------------------------------------------------------------------------------------------------------------------------------------------------------------------------------------------------------------------------------------------------------------------------------------------------------------------------------------------------------------------------------------------------------------------------------------------------------------------------------------------------------------------------------------------------------------------------------------------------------------------------------------------------------------------------------------------------------------------------------------------------------------------------------------------------------------------------------------------------------------------------------------------------------------------------------------------------------------------------------------------------------------------------------------------------------------------------------------------------------------------------------------------------------------------------------------------------------------------------------------------------------------------------------------------------------------------------------------------------------------------------------------|
| Kakinokil K. Surg<br>Today (2013) Full-text           | Consecutive patients with cirrhosis and hypersplenism undergoing hand-assisted laparoscopic splenectomy in Kagawa University Hospital from February 2008 through April 2010. All the patients were referred from the Department of Gastroenterology in the same hospital with the data related to liver functional reserve estimation, etiology of liver cirrhosis, accompanying hepatocellular carcinoma and esophageal varix.                                                                                                                                                                                                                                                                                                                                                                                                                                                                                                                                                                                                                                                                                                                                                                                                                                                                                                                                                                                                      |
| Kawanaka H. Ann<br>Surg (2010) Full-text              | Consecutive patients with cirrhosis and hypersplenism who underwent laparoscopic splenectomy in Kyushu University in the period from January 2005 to July 2006.                                                                                                                                                                                                                                                                                                                                                                                                                                                                                                                                                                                                                                                                                                                                                                                                                                                                                                                                                                                                                                                                                                                                                                                                                                                                      |
| Lai W. World J<br>Gastroenterol. (2012)<br>Full-text  | <p><i>Inclusion criteria:</i> patients with liver cirrhosis due to any causes; liver function grade: Child-Pugh A-B; splenomegaly and hypersplenism; severe esophageal varicose confirmed by gastroscopy; and previous histories of recurrent upper gastrointestinal bleeding. All patients signed the informed consent.</p> <p><i>Exclusion criteria:</i> patients who did not fulfill the inclusion criteria and could not tolerate surgical treatment were excluded.</p>                                                                                                                                                                                                                                                                                                                                                                                                                                                                                                                                                                                                                                                                                                                                                                                                                                                                                                                                                          |
| Ma J. Zhonghua Yi<br>Xue Za Zhi (2008)<br>Full-text   | Patients with portal hypertension undergoing splenectomy and pericardial devascularization.                                                                                                                                                                                                                                                                                                                                                                                                                                                                                                                                                                                                                                                                                                                                                                                                                                                                                                                                                                                                                                                                                                                                                                                                                                                                                                                                          |
| Pan WD. J<br>Gastroenterol Hepatol<br>(2011) Abstract | Patients with portal hypertension in liver cirrhosis from hepatitis who had simple splenectomy, splenectomy and EVL, splenectomy and portazygous devascularization were reviewed from March 1999 to June 2005.                                                                                                                                                                                                                                                                                                                                                                                                                                                                                                                                                                                                                                                                                                                                                                                                                                                                                                                                                                                                                                                                                                                                                                                                                       |
| Svensson M. Eur J<br>Haematol (2006)<br>Full-text     | <p>Adult patients, age <math>\geq 20</math> yr, underwent splenectomy for haematological disorders in the Department of Surgery at Huddinge University Hospital. The patients were selected retrospectively by examining the records in the Department of surgery databank for the splenectomy operation code and the pathological anatomy diagnosis register in the Department of Pathology for the spleen preparation code.</p> <p><i>Inclusion criteria:</i> 1. undergo laparoscopic splenectomy at The University of Alberta or Grey Nun's Community Hospitals; 2. sign a statement of informed consent; 3. willing to undergo daily subcutaneous injections of Lovenox®.</p> <p><i>Exclusion Criteria:</i> 1. pregnant or nursing; 2. unable or unwilling to provide informed consent; 3. bleeding diathesis or currently on anticoagulation therapy (i.e. coumadin, heparin, low molecular weight heparins); 4. hemorrhagic cerebral vascular accident; 5. severe uncontrolled hypertension; 6. diabetic or hemorrhagic retinopathy; 7. contradictions to anticoagulation (i.e. active gastrointestinal bleed, gastric or duodenal ulcer, sustained platelet count <math>&lt; 50 \times 10^3/uL</math>, splenectomy due to trauma or history of heparin induced thrombocytopenia); 8. conversion to open splenectomy; 9. allergy to Lovenox®, heparin, or other low molecular weight heparins; 10. bacterial endocarditis.</p> |
| Wang HL. Can J Surg<br>(2011) Full-text               | <p><i>Exclusion Criteria:</i> 1. pregnant or nursing; 2. unable or unwilling to provide informed consent; 3. bleeding diathesis or currently on anticoagulation therapy (i.e. coumadin, heparin, low molecular weight heparins); 4. hemorrhagic cerebral vascular accident; 5. severe uncontrolled hypertension; 6. diabetic or hemorrhagic retinopathy; 7. contradictions to anticoagulation (i.e. active gastrointestinal bleed, gastric or duodenal ulcer, sustained platelet count <math>&lt; 50 \times 10^3/uL</math>, splenectomy due to trauma or history of heparin induced thrombocytopenia); 8. conversion to open splenectomy; 9. allergy to Lovenox®, heparin, or other low molecular weight heparins; 10. bacterial endocarditis.</p>                                                                                                                                                                                                                                                                                                                                                                                                                                                                                                                                                                                                                                                                                   |
| Xue H. Zhonghua Wai<br>Ke Za Zhi. (2000)<br>Full-text | All patients had hepatitis B virus related liver cirrhosis, portal hypertension, splenomegaly, hypersplenism, esophageal varices, and a history of upper gastrointestinal bleeding. No thrombosis within portal venous system before surgery was observed by color Doppler ultrasound.                                                                                                                                                                                                                                                                                                                                                                                                                                                                                                                                                                                                                                                                                                                                                                                                                                                                                                                                                                                                                                                                                                                                               |

**Supplementary Table 2. Detailed information regarding the prevention of portal venous system thrombosis after splenectomy.**

| First author.<br>Journal. (Year)                         | Criteria of prevention                                                                                                                                                                                                                 | Timing of prevention                                                                                                                                                                       | Methods of prevention                                                                                                                                                                               |
|----------------------------------------------------------|----------------------------------------------------------------------------------------------------------------------------------------------------------------------------------------------------------------------------------------|--------------------------------------------------------------------------------------------------------------------------------------------------------------------------------------------|-----------------------------------------------------------------------------------------------------------------------------------------------------------------------------------------------------|
| Kakinokil K.<br>Surg Today<br>(2013) Full-text           | Prophylactic anticoagulation therapy was given at the discretion of each surgeon.                                                                                                                                                      | Postoperative day 1 and 2.                                                                                                                                                                 | Intravenous heparin (10000 U/d) followed by warfarin.                                                                                                                                               |
| Kawanaka H.<br>Ann Surg (2010)<br>Full-text              | During the first period, patients received no prophylactic therapy. During the second period, patients received prophylactic therapy.                                                                                                  | Postoperative day 1, 2, and 3.                                                                                                                                                             | Intravenous infusion of 1500 units of antithrombin III concentrates.                                                                                                                                |
| Lai W.<br>World J<br>Gastroenterol.<br>(2012) Full-text  | Irregular anticoagulation was given due to poor blood clotting after surgery and perioperative abdominal or GI bleeding. Regular anticoagulation was given to the patients with nearly normal blood clotting before and after surgery. | 24 hours after surgery.                                                                                                                                                                    | Subcutaneous injection of LMWH routinely, 0.3 ml per 12 hours for 5 days and then maintained by oral therapy with warfarin for one month to keep the target PT/INR at a level between 1.25 and 1.5. |
| Ma J.<br>Zhonghua Yi<br>Xue Za Zhi<br>(2008) Full-text   | Anticoagulation was given according to the randomization. But no detailed information regarding the randomization methods was provided.                                                                                                | Postoperative day 3.                                                                                                                                                                       | Compared with the control group, the treatment group was added with alprostadil (Lipo Prostaglandin E <sub>1</sub> ) 20µg once a day for 2 weeks.                                                   |
| Pan WD.<br>J Gastroenterol<br>Hepatol (2011)<br>Abstract | Information was not provided.                                                                                                                                                                                                          | Anticoagulation was given as PLT is more than 300×10 <sup>9</sup> /L (n=33) or in the earlier time (n=23) (no detailed information regarding the date when anticoagulation was initiated). | Anticoagulation was given, but no detailed information regarding the type and dosage of anticoagulants was provided.                                                                                |
| Svensson M.<br>Eur J Haematol<br>(2006) Full-text        | Patients undergoing LS because of ITP were not routinely given thromboembolic prophylaxis. All other patients splenectomised with LS or OS were given anticoagulants.                                                                  | Pre- and post-operation.                                                                                                                                                                   | Thromboembolic prophylaxis was subcutaneous injection of dalteparin 5000 IU once or 2500 IU twice daily until the day of discharge or longer, in median 7 days (range 1–30).                        |
| Wang HL.<br>Can J Surg<br>(2011) Full-text               | Anticoagulation was given according to the randomization. Patients were randomly assigned to the two groups using a random number table and sealed envelope containing postoperative instructions.                                     | Post-operation.                                                                                                                                                                            | Patients received 40 mg of enoxaparin subcutaneously once a day for 21 days; and patients with severe renal impairment received an adjusted dose of enoxaparin (a 30-mg subcutaneous dose daily).   |
| Xue H.<br>Zhonghua Wai<br>Ke Za Zhi.<br>(2000) Full-text | Anticoagulation was given according to the randomization. But no detailed information regarding the randomization methods was provided.                                                                                                | Post-operation.                                                                                                                                                                            | Urokinase 20000 U was infused via a tube inserted into the splenic vein branch every day for 14 days.                                                                                               |

**Abbreviations:** GI, gastrointestinal; INR, international normalized ratio; ITP, idiopathic thrombocytopenic purpura; LMWH, low molecular weight heparin; LS, laparoscopic splenectomy; OS, open splenectomy; PLT, platelets count; PT, prothrombin.

Supplementary Table 3. Patient characteristics of included studies.

| First author.<br>Journal. (Year)                         | Groups                       | No.<br>Pts | Sex<br>(M/F) | Age (yrs)                             | Type of diseases                                                                                                                                                                              | Liver function                                              |
|----------------------------------------------------------|------------------------------|------------|--------------|---------------------------------------|-----------------------------------------------------------------------------------------------------------------------------------------------------------------------------------------------|-------------------------------------------------------------|
| Kakinokil K.<br>Surg Today<br>(2013) Full-text           | No prevention                | 14         | 17/11        | Mean±SD<br>(range): 63±8.2<br>(45-76) | LC with hypersplenism                                                                                                                                                                         | Child-Pugh class A/B/C:<br>11/15/2                          |
|                                                          | Prevention                   | 14         |              |                                       |                                                                                                                                                                                               |                                                             |
| Kawanaka H.<br>Ann Surg (2010)<br>Full-text              | No prevention                | 25         | 16/9         | Median (range):<br>56 (41-71)         | HBV-LC (n=3); HCV-LC (n=20); alcoholic<br>LC (n=2)                                                                                                                                            | Child-Pugh score: median<br>(range): 7 (5-10)               |
|                                                          | Prevention                   | 25         | 10/15        | Median (range):<br>61 (45-76)         | HBV-LC (n=1); HCV-LC (n=21); alcoholic<br>LC (n=1); other (n=2)                                                                                                                               | Child-Pugh score: median<br>(range): 6.8 (5-10)             |
| Lai W.<br>World J<br>Gastroenterol.<br>(2012) Full-text  | Irregular<br>anticoagulation | 153        | 103/50       | Mean±SD:<br>46.14±10.39               | HBV-LC (n=128); HCV-LC (n=11);<br>alcoholic LC (n=11); IPH (n=1); biliary LC<br>(n=2)                                                                                                         | Child-Pugh class A/B:<br>121/32                             |
|                                                          | Regular<br>anticoagulation   | 148        | 99/49        | Mean±SD:<br>46.47±9.58                | HBV-LC (n=126); HCV-LC (n=8); alcoholic<br>LC (n=11); IPH (n=2); biliary LC (n=1)                                                                                                             | Child-Pugh class A/B:<br>125/23                             |
| Ma J.<br>Zhonghua Yi Xue<br>Za Zhi (2008)<br>Full-text   | No prevention                | 36         | NA           | NA                                    | LC and PH                                                                                                                                                                                     | TBIL: 20.7±4.8 µmol/L;<br>ALT: 32±10 U/L;<br>PT: 14.1±1.8 s |
|                                                          | Prevention                   | 40         | NA           | NA                                    | LC and PH                                                                                                                                                                                     | TBIL: 21.4±4.2 µmol/L;<br>ALT: 35±8 U/L;<br>PT: 13.6±1.5 s  |
| Pan WD.<br>J Gastroenterol<br>Hepatol (2011)<br>Abstract | No prevention                | 56         | NA           | NA                                    | Hepatitis-LC                                                                                                                                                                                  | NA                                                          |
|                                                          | Prevention                   | 56         | NA           | NA                                    | Hepatitis-LC                                                                                                                                                                                  | NA                                                          |
| Svensson M.<br>Eur J Haematol<br>(2006) Full-text        | No prevention                | 15         | 37/32        | Median (range):<br>56 (20-80)         | Idiopathic thrombocytopenic purpura<br>(n=14); haematological malignancy (n=1)                                                                                                                | NA                                                          |
|                                                          | Prevention                   | 54         |              |                                       | Idiopathic thrombocytopenic purpura<br>(n=11); autoimmune haemolytic anaemia<br>(n=5); haematological malignancy (n=36);<br>thalassaemia (n=1); chronic neutropenia<br>(n=1)                  | NA                                                          |
| Wang HL.<br>Can J Surg<br>(2011) Full-text               | No prevention                | 14         | 5/9          | Median (range):<br>46 (18-74)         | Immune thrombocytopenic purpura (n=10);<br>thrombotic thrombocytopenic purpura<br>(n=2); chronic lymphocytic leukemia (n=1);<br>lymphoma (n=1)                                                | NA                                                          |
|                                                          | Prevention                   | 15         | 11/4         | Median (range):<br>59 (17-72)         | Immune thrombocytopenic purpura (n=5);<br>thrombotic thrombocytopenic purpura<br>(n=1); chronic lymphocytic leukemia (n=2);<br>lymphoma (n=2); hereditary spherocytosis<br>(n=1); other (n=4) | NA                                                          |

|                                |               |    |       |                               |               |                                   |
|--------------------------------|---------------|----|-------|-------------------------------|---------------|-----------------------------------|
| Xue H.<br>Zhonghua Wai         | No prevention | 35 | 26/9  | Mean (range):<br>41.2 (21-60) | HBV-LC (n=35) | Child-Pugh class A/B/C:<br>5/22/8 |
| Ke Za Zhi. (2000)<br>Full-text | Prevention    | 36 | 26/10 | Mean (range):<br>40.8 (20-59) | HBV-LC (n=36) | Child-Pugh class A/B/C:<br>6/21/9 |

**Abbreviations:** ALT, alanine aminotransferase; F, female; HBV, hepatitis B virus; HCV, hepatitis C virus; IPH, Idiopathic portal hypertension; LC, liver cirrhosis; M, male; NA, not available; PH, portal hypertension; PT, prothrombin time; PVST, portal venous system thrombosis; SD, standard deviation; TBIL, total bilirubin.

**Supplementary Table 4. Quality assessment of randomized studies using the Cochrane Collaboration's tool for assessing risk of bias.**

| <b>Authors Journal (Year)</b> |                                                | <b>Ma J. Zhonghua<br/>Yi Xue Za Zhi<br/>(2008) Full-text</b> | <b>Wang HL. Can J<br/>Surg (2011)<br/>Full-text</b> | <b>Xue H. Zhonghua<br/>Wai Ke Za Zhi.<br/>(2000) Full-text</b> |
|-------------------------------|------------------------------------------------|--------------------------------------------------------------|-----------------------------------------------------|----------------------------------------------------------------|
| <b>Selection bias.</b>        | <b>Random sequence generation.</b>             | Unclear risk                                                 | Low risk                                            | Unclear risk                                                   |
|                               | <b>Allocation concealment.</b>                 | Unclear risk                                                 | Low risk                                            | Unclear risk                                                   |
| <b>Performance bias.</b>      | <b>Blinding of participants and personnel.</b> | Unclear risk                                                 | High-risk                                           | Unclear risk                                                   |
| <b>Detection bias.</b>        | <b>Blinding of outcome assessment.</b>         | Low-risk                                                     | Low-risk                                            | Low-risk                                                       |
| <b>Attrition bias.</b>        | <b>Incomplete outcome data.</b>                | Unclear risk                                                 | High risk                                           | Unclear risk                                                   |
| <b>Reporting bias.</b>        | <b>Selective reporting.</b>                    | Unclear risk                                                 | Unclear risk                                        | Unclear risk                                                   |
| <b>Other bias.</b>            | <b>Other sources of bias.</b>                  | Unclear risk                                                 | Unclear risk                                        | Unclear risk                                                   |

Supplementary table 5. Quality assessment of non-randomized studies using Newcastle-Ottawa scale

| Authors Journal (Year) |                                                                                                                                                              | Kakinokil K.<br>Surg Today<br>(2013)<br>Full-text | Kawanaka H.<br>Ann Surg<br>(2010)<br>Full-text | Lai W.<br>World J<br>Gastroenterol.<br>(2012) Full-text | Pan WD.<br>J Gastroenterol<br>Hepatol (2011)<br>Abstract | Svensson M.<br>Eur J Haematol<br>(2006) Full-text |
|------------------------|--------------------------------------------------------------------------------------------------------------------------------------------------------------|---------------------------------------------------|------------------------------------------------|---------------------------------------------------------|----------------------------------------------------------|---------------------------------------------------|
| Selection              | 1) Representativeness of prevention group (the exposed cohort)                                                                                               | ★                                                 | ★                                              | ★                                                       | ★                                                        | ★                                                 |
|                        | 2) Selection of no prevention group (the non exposed cohort)                                                                                                 | ★                                                 | ★                                              | ★                                                       | ★                                                        | ★                                                 |
|                        | 3) Ascertainment of patients receiving the prevention (exposure)                                                                                             |                                                   | ★                                              |                                                         |                                                          | ★                                                 |
|                        | 4) Demonstration that PVST was not present at start of study                                                                                                 | ★                                                 | ★                                              |                                                         |                                                          |                                                   |
| Comparability          | 1) Comparability of cohorts on the basis of the design or analysis (sex and age as the most important fact, type of diseases as the second important factor) |                                                   | ★★                                             | ★★                                                      |                                                          |                                                   |
| Outcome                | 1) Assessment of PVST outcome                                                                                                                                | ★                                                 | ★                                              | ★                                                       | ★                                                        | ★                                                 |
|                        | 2) Was follow-up long enough for outcomes to occur (>1 month)                                                                                                |                                                   | ★                                              |                                                         |                                                          | ★                                                 |
|                        | 3) Adequacy of follow up of cohorts (rate of follow up>80%)                                                                                                  |                                                   |                                                |                                                         |                                                          |                                                   |
| Total score            |                                                                                                                                                              | 4 stars                                           | 8 stars                                        | 5 stars                                                 | 3 stars                                                  | 5 stars                                           |



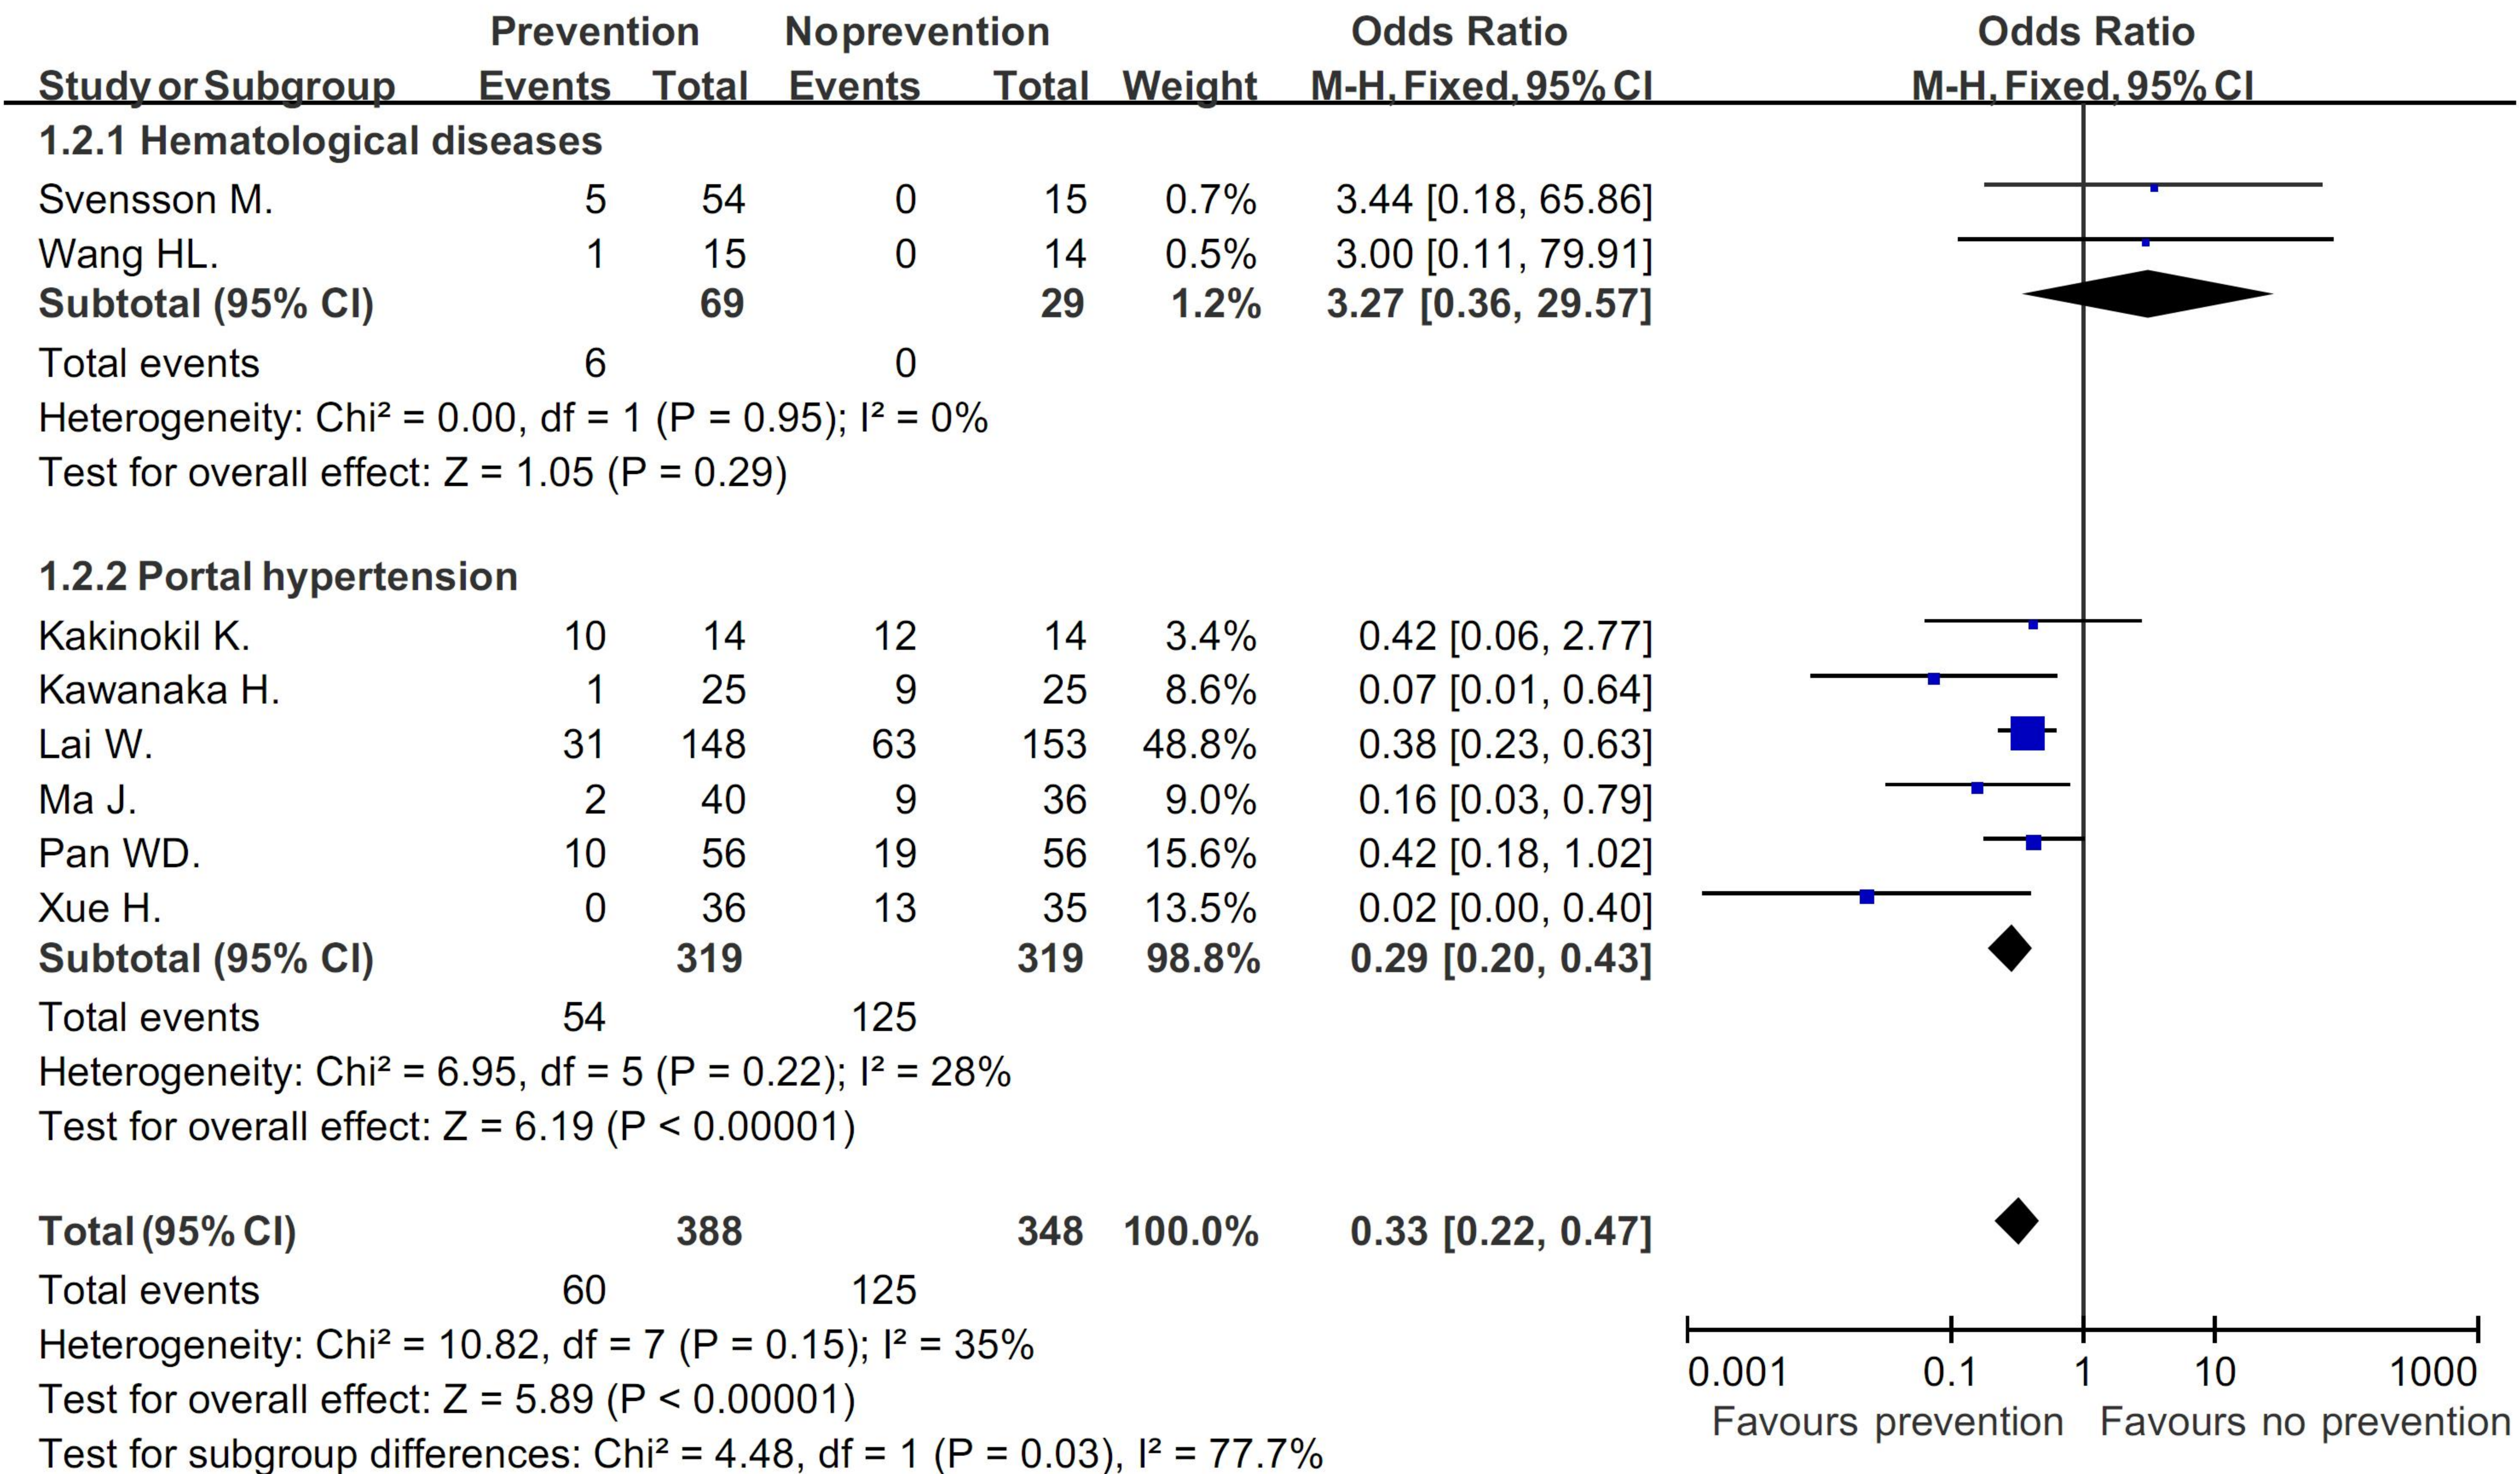



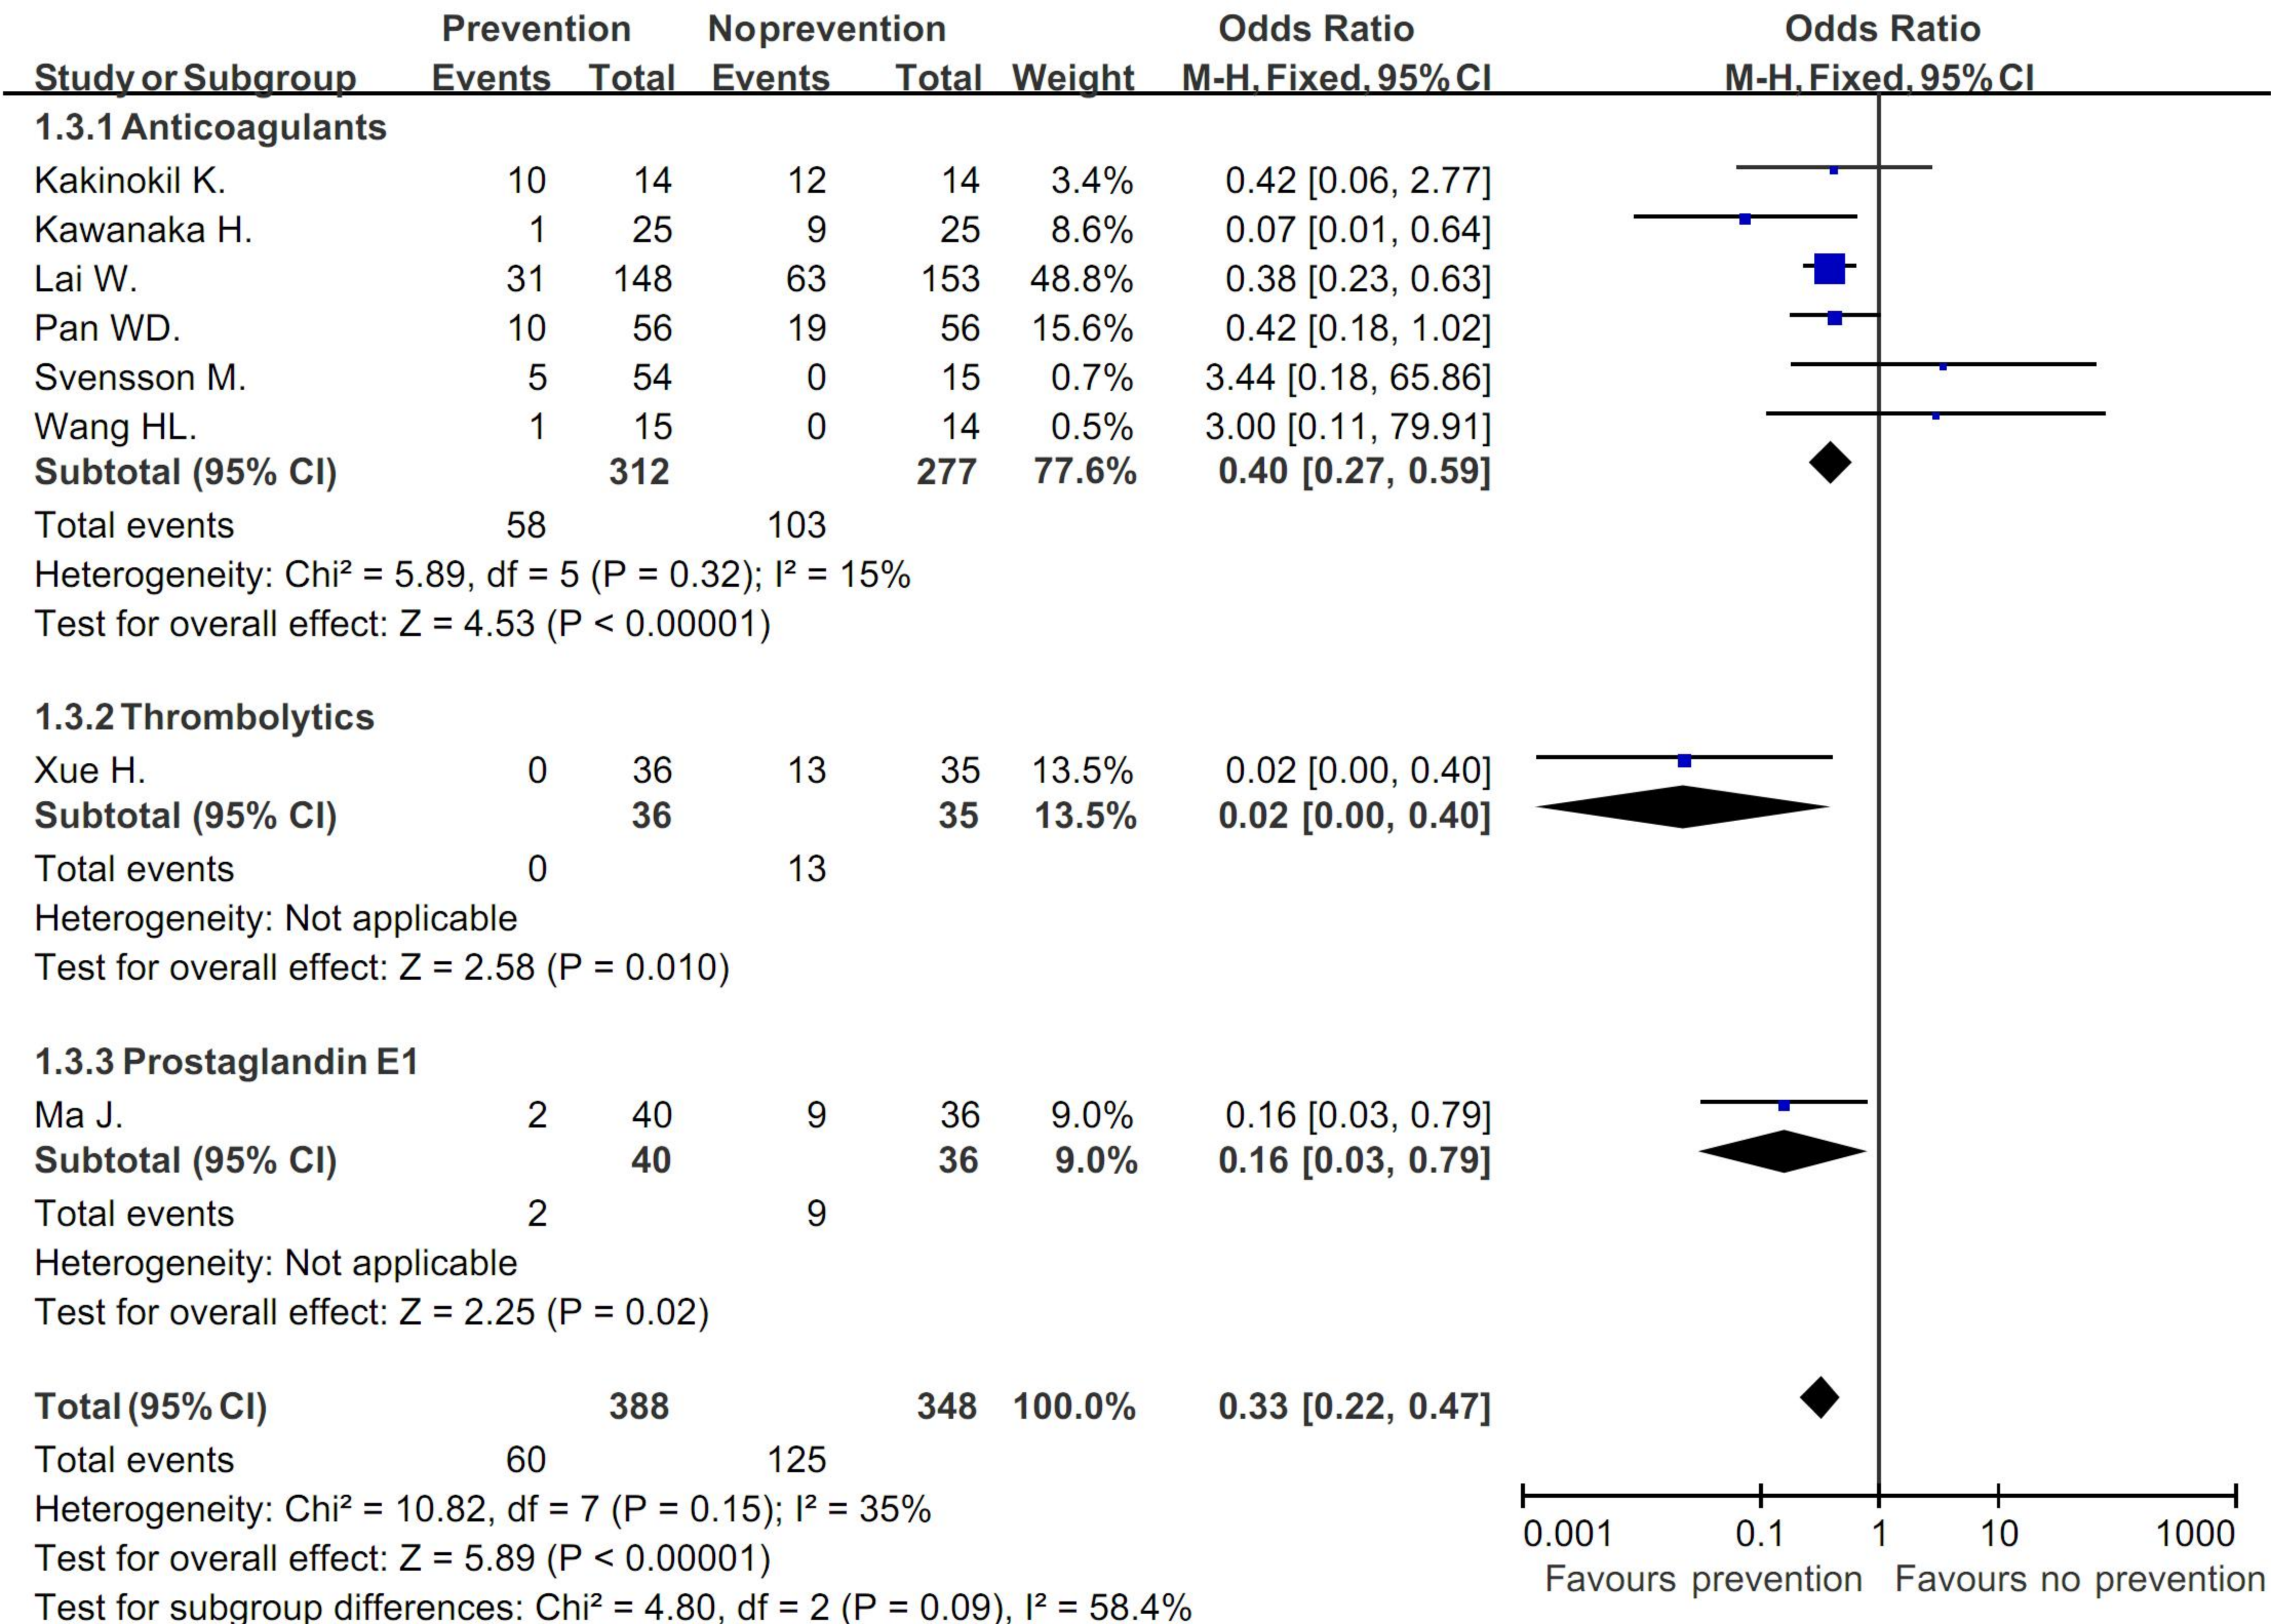



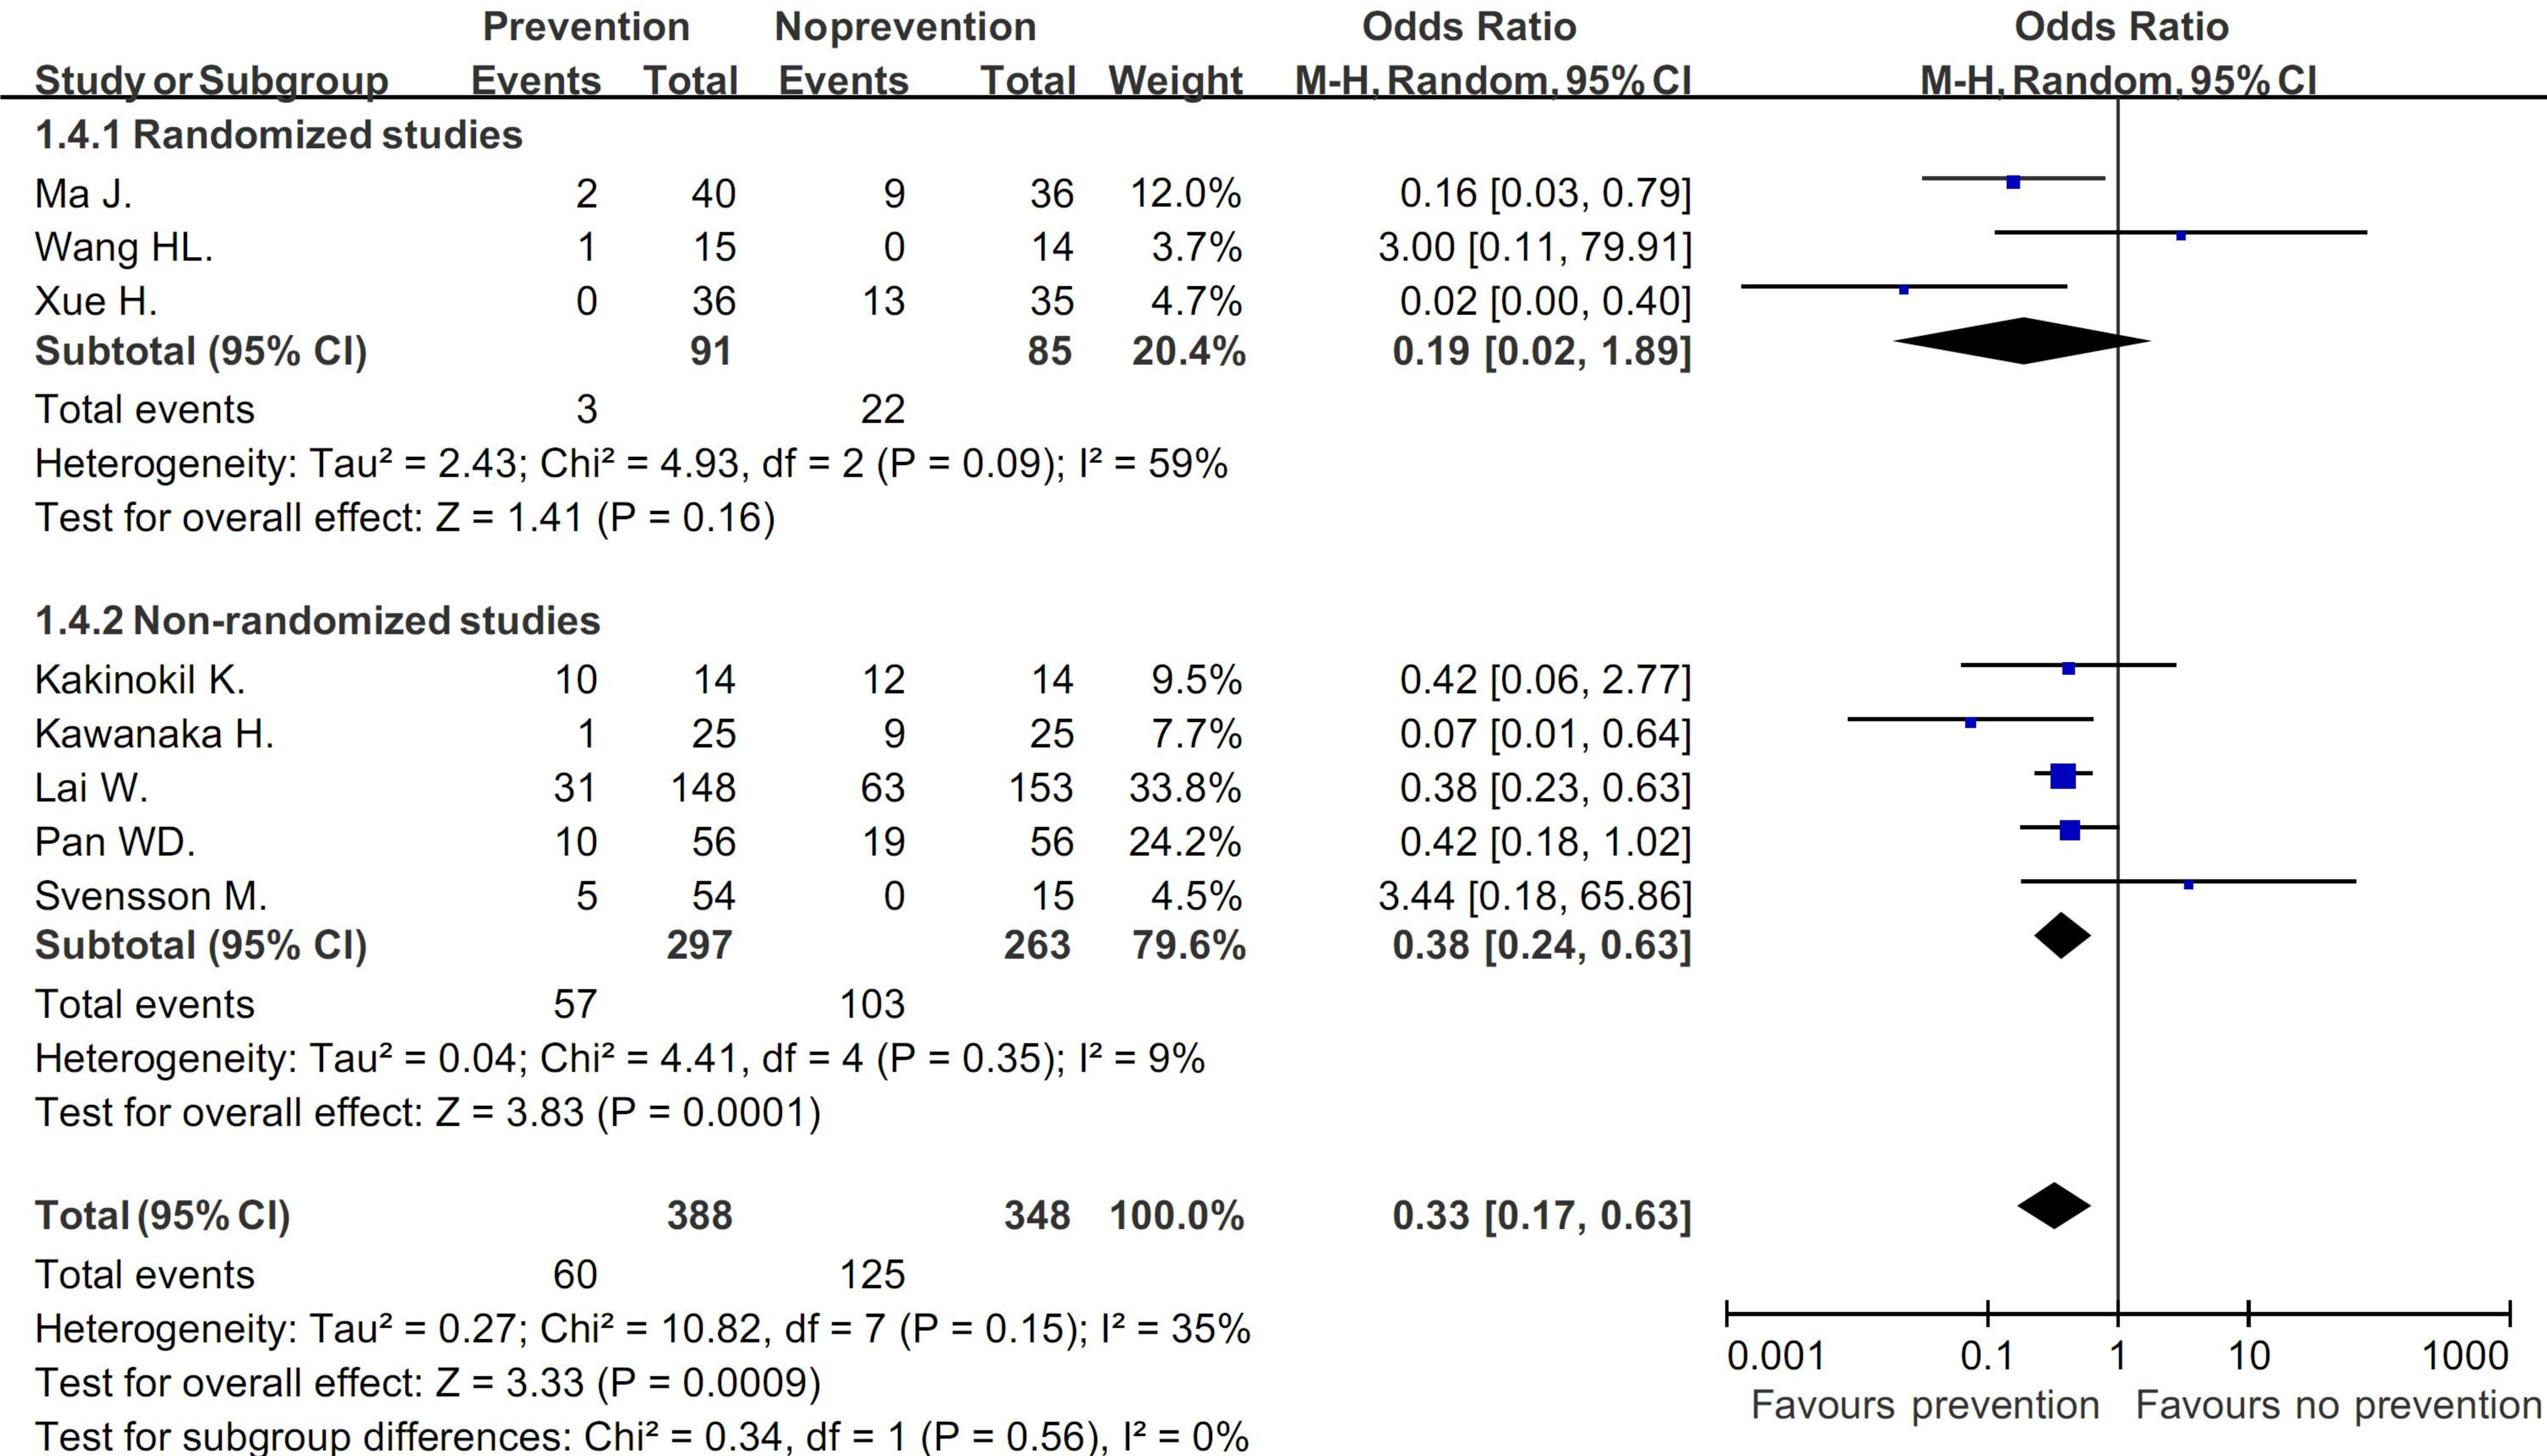

Supplement: 292689.f1.pdf [file 292689.f1.pdf]
